# Supplementary material for: Molecular evolutionary and structural analysis of human UCHL1 gene demonstrates the relevant role of intragenic epistasis in Parkinson’s disease and other neurological disorders
Source: PubMed Central journal article supplement (PMC7542113; doi:10.1186/s12862-020-01684-7), 2020-10-07
Supplement: 12862_2020_1684_MOESM3_ESM.pdf [file 12862_2020_1684_MOESM3_ESM.pdf]

# **Additional file 3 for: Molecular evolutionary and structural analysis of human *UCHL1* gene demonstrates the relevant role of intragenic epistasis in Parkinson's disease and other neurological disorders**

Muhammad Saqib Nawaz<sup>1</sup>, Razia Asghar<sup>1</sup>, Nashaiman Pervaiz<sup>1</sup>, Shahid Ali<sup>1</sup>, Irfan Hussain<sup>1</sup>, Peiqi Xing<sup>2</sup>, Yiming Bao<sup>2\*</sup> & Amir Ali Abbasi<sup>1\*</sup>

<sup>1</sup>National Center for Bioinformatics, Program of Comparative and Evolutionary Genomics, Faculty of Biological Sciences, Quaid-i-Azam University, Islamabad 45320, Pakistan

<sup>2</sup>National Genomics Data Center; BIG Data Center & CAS Key Laboratory of Genome Sciences and Information, Beijing Institute of Genomics, Chinese Academy of Sciences, Beijing, 100101, China

\*Corresponding authors

Y.B\*:E-mail: [baoym@big.ac.cn](mailto:baoym@big.ac.cn)

A.A.A\*:E-mail: [abbasiam@qau.edu.pk](mailto:abbasiam@qau.edu.pk)

### **Additional file 3: Complete list of protein sequences used in this study.**

#### **UCHL1**

>Homo sapiens Uchl1

MQLKPMEINPEMLNKVLSRLGVAGQWRFVDVLGLEEESLGSVPAPACALLLFLPLTAQHENFRKKQIEELKGQEVSPKV  
YFMKQTIGNSCGTIGLIHAVANNQDKLGFEDGSVLKQFLSETEKMSPEDRAKCFEKNEAIQAAHDAVAQEGQCRVDDK  
VNFHFILFNNVDGHLYELDGRMPFPVNHGASSEDLLKDAAKVCREFTEREQGEVRFSAVALCKAA

>Pan troglodytes Uchl1

MQLKPMEINPEMLNKVLSRLGVAGQWRFVDVLGLEEESLGSVPAPACALLLFLPLTAQHENFRKKQIEELKGQEVSPKV  
YFMKQTIGNSCGTIGLIHAVANNQDKLGFEDGSVLKQFLSETEKMSPEDRAKCFEKNEAIQAAHDAVAQEGQCRVDDK  
VNFHFILFNNVDGHLYELDGRMPFPVNHGASSEDLLKDAAKVCREFTEREQGEVRFSAVALCKAA

>Gorilla gorilla Uchl1

MQLKPMEINPEMLNKVLSRLGVAGQWRFVDVLGLEEESLGSVPAPACALLLFLPLTAQHENFRKKQIEELKGQEVSPKV  
YFMKQTIGNSCGTIGLIHAVANNQDKLGFEDGSVLKQFLSETEKMSPEDRAKCFEKNEAIQAAHDAVAQEGQCRVDDK  
VNFHFILFNNVDGHLYELDGRMPFPVNHGASSEDLLKDAAKVCREFTEREQGEVRFSAVALCKAA

>Macaca mulatta Uchl1

MQLKPMEINPEMLNKVLSRLGVAGQWRFVDVLGLEEESLGSVPAPACALLLFLPLTAQHENFRKKQIEELKGQEVSPKV  
YFMKQTIGNSCGTIGLIHAVANNQDKLGFEDGSVLKQFLSETEKMSPEDRAKCFEKNEAIQAAHDAVAQEGQCRVDDK  
VNFHFILFNNVDGHLYELDGRMPFPVNHGASSEGTLQDAAKVCREFTEREQGEVRFSAVALCKAA

>Cebus capucinus Uchl1

MQLKPMEINPEMLNKVLSRLGVAGQWRFVDVLGLEEESLGSVPAPACALLLFLPLTAQHENFRKKQIEELKGQEVSPKV  
YFMKQTIGNSCGTIGLIHAVANNQDKLGFEDGSVLKQFLSETEKMSPEDRAKCFEKNEAIQAAHDAVAQEGQCRVDDK  
VNFHFILFNNVDGHLYELDGRMPFPVNHGTSSEDTLLQDAAKVCREFTEREQGEVRFSAVALCKAA

>Otolemur garnettii Uchl1

MQLKPMEINPEMLNKVLARLGVAGQWRFADVLGLEEESLGSVPAPACALLLFLPLTAQHENFRKKQIEELKGQEVSPV  
YFMKQTIGNSCGTIGLIHAVANNRDKLEFEDGSVLKQFLSETEKMSPEDRAKCFEKNEAIQAAHDAVAQEGQCRVDDK  
VNFHFILFNNVDGHLYELDGRMPFPVNHGASSEDCLLQDAAKVCREFTEREQGEVRFSAVALCKAA

>Mus musculus Uchl1

MQLKPMEINPEMLNKVLAKLGVAGQWRFADVLGLEEETLGSVPSPACALLLFLPLTAQHENFRKKQIEELKGQEVSPKV  
YFMKQTIGNSCGTIGLIHAVANNQDKLEFEDGSVLKQFLSETEKLSPEDRAKCFEKNEAIQAAHDSVAQEGQCRVDDKV  
NFHFILFNNVDGHLYELDGRMPFPVNHGASSEDSLLQDAAKVCREFTEREQGEVRFSAVALCKAA

>Rattus norvegicus Uchl1

MQLKPMEINPEMLNKVLAKLGVAGQWRFADVLGLEEETLGSVPSPACALLLFLPLTAQHENFRKKQIEELKGQEVSPKV  
YFMKQTIGNSCGTIGLIHAVANNQDKLEFEDGSVLKQFLSETEKLSPEDRAKCFEKNEAIQAAHDSVAQEGQCRVDDKV  
NFHFILFNNVDGHLYELDGRMPFPVNHGASSEDSLLQDAAKVCREFTEREQGEVRFSAVALCKAA

>Equus caballus Uchl1

MQLKPMEINPEMLNKVLARLGVAGQWRFVDVLGLEEETLGSVPAPACALLLFLPLTAQHENFRKKQIEELKGQEVSPK  
VYFMKQTIGNSCGTIGLIHAVANNQDKLEFEDGSVLKQFLSETEKLSPEDRAKCFEKNEAIQAAHDAVAQEGQCRVDDK  
VNFHFILFNNVDGHLYELDGRMPFPVNHGASSEDLLLQDAAKVCREFTEREQGEVRFSAVALCKAA

>Tursiops truncatus Uchl1

MQLKPMEINPEMLNKVLARLGVAGQWRFEDVLGLEEESLGSVPAPACALLLFLPLTAQHENFRKKQIEELKGQEVSPKV  
YFMKQTIGNSCGTIGLIHAVANNQDKLEFEDGSVLKQFLSETEKLSPEDRAKCFEKNEAIQAAHDAVAQEGQCRVDDKV  
NFHFILFNNVDGHLYELDGRMPFPVNHGASSEGSLLQDAAKVCREFTEREQGEVRFSAVALCKAA

>Bos taurus Uchl1

MLQKPMEINPEMLNKVLRTRGVAGQWRFEDVLGLEEESLGSVPAPACALLLFLPLTAQHENFRKKQIEELKGQEVSPKV  
YFMKQTIGNSCGTIGLIHAVANNQDKLEFEDGSVLKQFLSETEKLSPEDRAKCFEKNEAIQAAHDAVAQEGQCRVDDKV  
NHFHILFNNVDGHLIELDGRMPFPVNHGTSSSEDSLLQDAAKVCREFTEREQGEVRFSAVALCKAA

>Felis catus Uchl1

MLQKPMEINPEMLNKVLSRLGVAGQWRFADVLGLEEEALGSVPAPACALLLFLPLTAQHENFRKKQIEELKGQEVSPK  
VYFMKQTIGNSCGTIGLIHAVANNQDKLEFEDGSVLKQFLSETEKLSPEDRAKCFEKNEAIQAAHDAVAQEGQCRVDDK  
VNFHILFNNVDGHLIELDGRMPFPVNHGTSSSEDSLLQDAAKVCREFTEREQGEVRFSAVALCKAA

>Canis lupus familiaris Uchl1

MLQKPMEINPEMLNKQVLRARLVAGQWRFADVLGLEDEALGSVPAPACALLLFLPLTAQHENFRKKQIEELKGQEVSP  
KVYFMKQTIGNSCGTIGLIHAVANNQDKLEFEDGSVLKQFLSETEKLSPEDRAKCFEKNEAIQAAHDAVAQEGQCRVDD  
KVNHFHILFNNVDGHLIELDGRMPFPVNHGTSSSEDSLLQDAAKVCREFTEREQGEVRFSAVALCKAA

>Pteropus vampyrus Uchl1

MLQKPMEINPEMLNKVLRARLVAGQWRFVDVLGLEDEALSSVPAPACALLLFLPLTAQHENFRKKQIEELKGQEVSPK  
VYFMKQTIGNSCGTIGLIHAVANNQDKLEFDDGSVLRQFLSETEKLSPEDRAKCFEKNEAIQAAHDAVAQEGQCRVDD  
KVNHFHILFNNVDGHLIELDGRMPFPVNHGSSSEDSLLQDAAKVCREFTEREQGEVRFSAVALCKAA

>Myotis lucifugus Uchl1

MLQKPMEINPEMLNKVLRARLVAGQWRFVDVLGLEEDALSSVPAPVACALLLFLPLTAQHENFRKKQIEELKGQEVSPK  
VYFMKQTIGNSCGTIGLIHAVANNQDKLEFEDGSVLKQFLSETEKLSPEDRAKCFEKNEAIQTAHDAVAQEGQCRVDDK  
VNFHILFNNVDGHLIELDGRMPFPVNHGTAEDSLLQDAAKVCREFTEREQGEVRFSAVALCKAT

>Erinaceus uropaeus Uchl1

MLQKPMEINPEMLNKXXXXXXGQWRFVDVLGLEDESLSVPAPACALLLFLPLTAQHENFRKKQIEELKGQEVSPK  
VYFMKQTIGNSCGTIGLIHAVANNQDKLEFEDGSVLKQFLSETEKLSPEDRAKCFEKNEAIQAAHDAVAQEGQCRVDDK  
VNFHILFNNVDGHLIELDGRMPFPVNHGSSSEDSLMQDAAKVCREFTEREQGEVRFSAVALCKAA

>Echinops telfairi Uchl1

MLQKPMEINPEMLNKVSGVSRPPGAPGTPRRRRPPGGAPPCAFPRPPEFGWGLGSVPAPACALLLFLPLTAQHENF  
RKKQIEELKGQEVSPKVYFMKQTIGNSCGTIGLIHAVANNQDKLAFENGSVLKQFLSETEKMSPEDRAKCFEKNEAIQAA  
HDAVAQEGQCRVDDKVNHFHILFNNVEGHLYELDGRMPFPVNHGSSSEDSLLQDAAKVCREFTEREQGEVRFSAVAL  
CKAA

>Monodelphis domestica Uchl1

MLQKPMEINPEMLNKVLRTRGVGGDWKFVDVLGLEEDVLGTVPAPACALLLFLPLTAQHENFRKKQIEELKGQEVSPK  
VYFMKQTVGNSCGTIGLIHAVANNQDKLNFDDGSVLKQFISETAKLSPEDRAKCFEKNEAIQAAHDAVAQEGQCRVDD  
EVNFHILFNNVDGHLIELDGRMPFPINHGNSDESVLKGAEEICRQFTEREQGEVRFSAVALCKCA

>Gallus gallus Uchl1

MAWQPMEINPEMLNKVLSRLGVSPGWRFVDVLGFEEALGAVPSPACALLLFLPLTEQHENFRKKQTEKIKDQEISSK  
VYFLKQTVSNSCGTIGLIHAVANNKDKVKLDEGSALKKFLDETADLSPEERAKRFANNKAIQEVHNSVAQEGQCRVEDN  
SVNFHILFANVDGHLIELDGRLPFPVNHGTSSDDLKDSAKICRQFTEREKGEVRFSAVAFCKSA

>Anolis carolinensis Uchl1

MAWQPMEINPEMLNKVLSRLGIAPGWRFVDVLGFEEESLNAVNPACALLLFLPLTAQHENFRKKQVEELKGQEVSS  
KVYFLKQTASNCGTIGLIHAIANNQDKILFDEGSALKEFLNATADLSPDERAKRLENNKAIQDAHNAVAEEGQCRAEDD  
KVNHFHILFASVDGQLYELDGRMPFPINHGASSDDTLKASAKVCRQFTEREQGEVRFSAVALSKSA

>Latimeria chalumnae Uchl1

MWQPMEINPEMLNKVLRARLVGSGSWHLVDVLGLEEESLASVPTPVCALMMLLFLPLTAQHESFRKKQMEEVAEKQVN  
PKVYFMKQTVNNSCGTVGLVHAVANNQDKLKFEDDSALKQFLTETADMSAGDRAKCLEKNKIIQEAHDAIAKEGLCRV  
EEGSVNFHIFITANIDGNLYELDGRMSFPVNHGSTTKDILLQDAAKICRQFTEREQGEVRFSAVALCKVK

>Oryzias latipes Uchl1

MEWTPMEINPEMLNKIMSKLGVGDSWRFVDVLGLEGEQLSAVPKPCALMMLLFLPLTQQHESFRAQQADKVDDGSEV  
YFLKQKAGNSCGTIALHAVANNKDKMAFDAGSALKKFLFLEETANMSPDDRAKHLEQNKAIYDAHNEVAMQGCRCRPE  
ADKINFHFIANAKGNLYECDGKMDGPNHGETTEESFLADAACKVCRGFTEREKDEVRFSAVALCRS

>Gasterosteus aculeatus Uchl1

MEWTPMEINPEMLNKMMLNLGVGESWRFSDVLGFEDQLSAVPKPCCALMLLPLTQQHESFRQQQADSVDGSG  
VYFLKQTASNSCGTIAMHLHAVANNKSKMSFEGGSALKKFLDETANMSADDRAKHLEKNKAIWEAHNEVAAQQGQCRP  
EADKVNHFHIAFVNVTGQLYEFDGRMNGPVKHGATKDDSFVMDAAKVCRGFIEREQGEQPLYLCMWSLSDSFIL

>Tetraodon nigroviridis Uchl1

MEWTPMELNPEMLNMLMTSLGVNESWRFVDVVGLESEQLSAVPKPCCALMLLPLTQQHESFRKQQADKIVEETGV  
YFLKQMAPNSCGTVALLHAVANNKGKLTFAASDVLQKFLDETADMSSDDRAKHLEKN

>Takifugu rubripes Uchl1

MEWTAMELNPEMLNLLMKSLGVNESWRFVDVVGLESEQLSAVPKPCCSLMLLPLTQQHETFRKQQADKIAEDSGV  
YFLKQTASNSCGTIALHAVANNKGKFAFASGSVLEKFLNETANMSPEDRAKHLENNKTIFDAHNEVASQQGQCRPAAD  
KVNHFHIFVNVNGQLYEFDGRVNGPVKHGSTSDESIFIMDAAKVCHGFMEREQGEVRFSSVALCQS

>Danio rerio Uchl1

MEWKPMELNPEMLNKVLSKLGVGSKWRFVDVLGLEDESLSGVSPCCAMMLLPLTQQHEDFRSKQSVGDCKDVYF  
LKQTVVNSCGTVGLVHAVANNQDSIDFDNNSALKKFLSATSGMSPAERAKELEQNKAIQETHDAVADEGQCRPEADK  
VNFHFIFVNVNGRLYELDGRIDGPVSHGPTKPDFVMDAARVCREFMEREKGEVRFSAVALCKA

>Lepisosteus oculatus Uchl1

STAMEWKPMELNPEMLNKVLSKLGVDWRFVDVLGFEDPLASVPKPSCAVMLLPLTPQHETFREKQSTELAEEKAK  
EIPSVYFIKQTIIVNSCGTVGLLHAVANNKDKLEFKSGSALKSFLDKTASMSAEDRAKELEKSQAIHTAHDEVAEAGQCRV  
EEDKVNHFHIFINVDGHLIELDGRMSVPVDHGATKDDSFIMDAKICRQFVEREKGEVRFSAVALCKAA

>Callorhinchus milii Uchl1

MEWKAMEINPEMLNKCMTLRLGVAASWKVFDVLGLETESLSMVSPVCALLLPLSQQHESFRGTQTSSELTGKGIDSK  
IYFLRQTISNSCGTVGLVHTIANNQDKFTFVEGSTLKKFLTETADLSAERAKHLEQNKDIHSAHDATAEEGHCRIHEDGT  
NHFHIFVDVDGHLIELDGRMPFPIDHGETSKDTLLQDSAKICRQFMERDQEEVRFSTAVALSKA

>Rhincodon typus Uchl1

MEWKPMELNPEMLNKLSRLGVASSWKVFDVLGLENESLSMVSPVCALMLLPLSQQHESYRERQTSSELSGKGIDSKI  
YFVKQTISNSCGTXGLINTIANNQDKLDFVEGSVLKKFLNETVDLSAERAKQLEKQEQEICAHDATAEEGECRVHEDGT  
NHFHIFVGVDDHLYELDGRMPFPIDHGETSNDQLLQDSAKICRQFMERDQGEVRFSTAVALSKAS
